# Supplementary material for: Discovery of a novel IKK-β inhibitor by ligand-based virtual screening techniques
Source: PubMed Central journal article supplement — Bioorg Med Chem Lett. 2011 Jan 1;21(1):577–83. doi: 10.1016/j.bmcl.2010.10.051 (PMC3013379; doi:10.1016/j.bmcl.2010.10.051), 2011-01-01
Supplement: mmc1.pdf [file mmc1.pdf]

## **Supporting Information:**

### **Discovery of a novel IKK- $\beta$ inhibitor by ligand-based virtual screening techniques**

*Stefan M. Noha, Atanas G. Atanasov, Daniela Schuster, Patrick Markt, Nanang Fakhrudin, Elke H. Heiss, Olivia Schrammel, Judith M. Rollinger, Hermann Stuppner, Verena M. Dirsch, and Gerhard Wolber*

This supporting material document contains

- 1) All compounds from the literature dataset as referenced in the manuscript including references to all the articles introducing the compounds.
- 2) A detailed experimental description of the parameters for the docking study.

1) IKK- $\beta$  Literature-Dataset

Baxter et al., 2004<sup>1</sup>

---

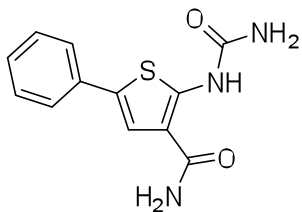

CAS 354811-10-2  
 $IC_{50} = 13 \text{ nM}$

compound 4

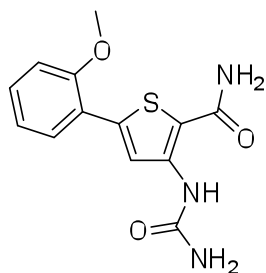

CAS 354811-06-6  
 $IC_{50} = 200 \text{ nM}$

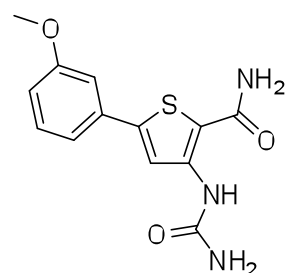

CAS 354811-09-9  
 $IC_{50} = 300 \text{ nM}$

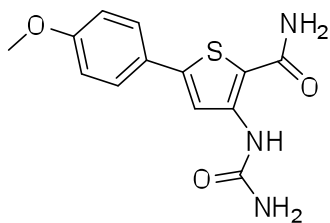

CAS 354810-95-0  
 $IC_{50} = 50 \text{ nM}$

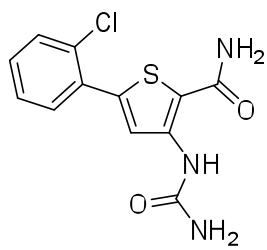

CAS 354811-04-4  
 $IC_{50} = 100 \text{ nM}$

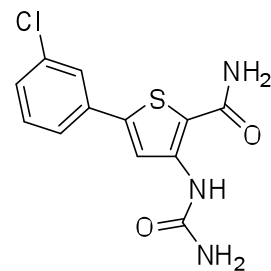

CAS 354810-83-6  
 $IC_{50} = 40 \text{ nM}$

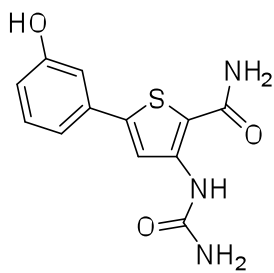

CAS 354811-01-1  
 $IC_{50} = 100 \text{ nM}$

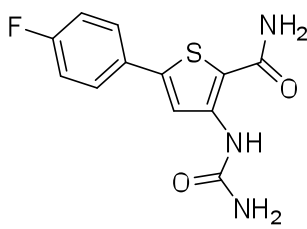

CAS 354810-86-9  
 $IC_{50} = 63 \text{ nM}$

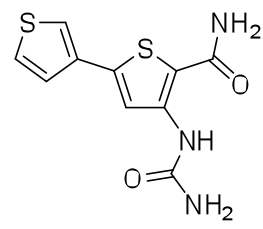

CAS 354810-98-3  
 $IC_{50} = 63 \text{ nM}$

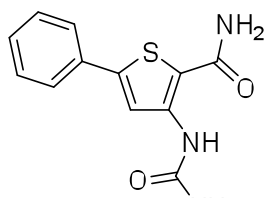

CAS 354810-80-3  
 $IC_{50} = 25 \text{ nM}$

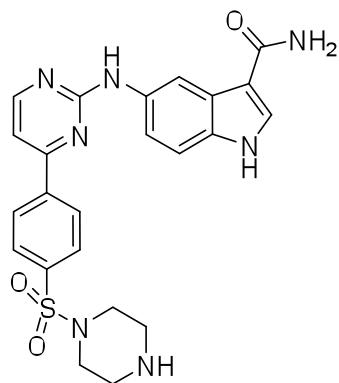

CAS 677753-06-9  
IC<sub>50</sub> = 550 nM

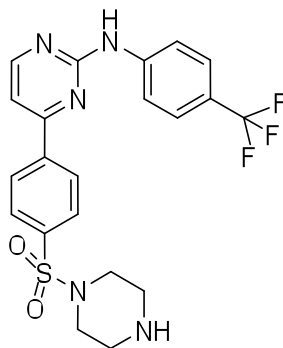

CAS 677753-07-0  
IC<sub>50</sub> = 513 nM

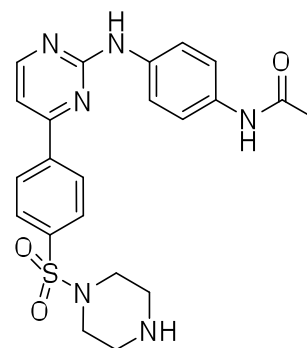

CAS 677753-08-1  
IC<sub>50</sub> = 331 nM

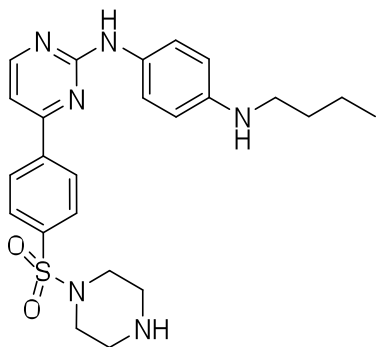

CAS 677753-09-2  
IC<sub>50</sub> = 309 nM

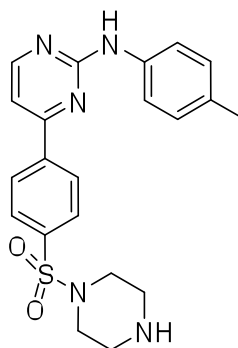

CAS 677753-10-5  
IC<sub>50</sub> = 269 nM

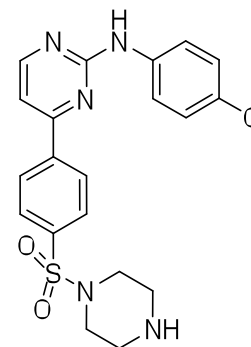

CAS 677753-11-6  
IC<sub>50</sub> = 214 nM

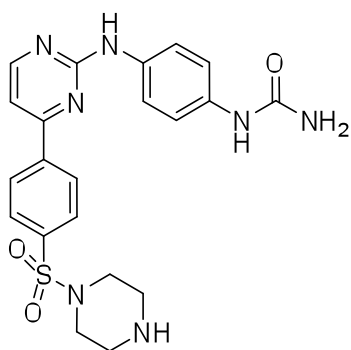

CAS 677753-12-7  
IC<sub>50</sub> = 155 nM

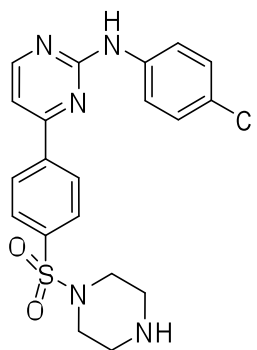

CAS 677753-13-8  
IC<sub>50</sub> = 148 nM

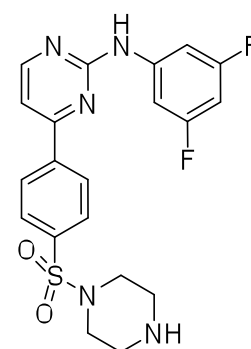

CAS 677753-14-9  
IC<sub>50</sub> = 117 nM

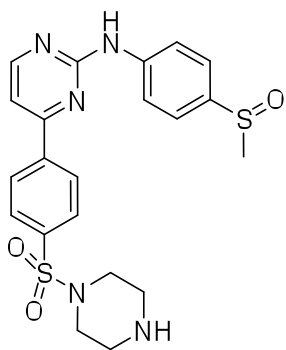

CAS 677753-15-0  
IC<sub>50</sub> = 91 nM

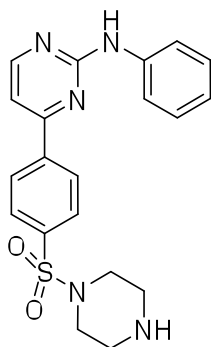

CAS 677753-16-1  
IC<sub>50</sub> = 91 nM

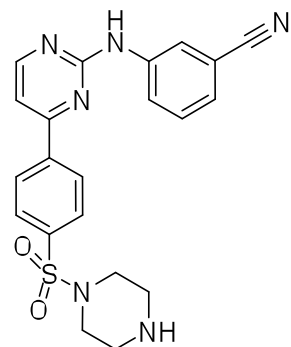

CAS 677753-17-2  
IC<sub>50</sub> = 83 nM

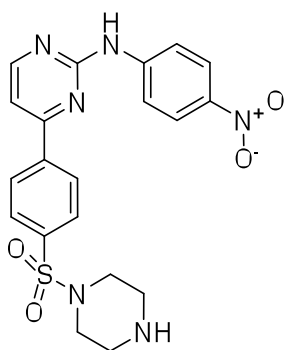

CAS 677753-18-3  
IC<sub>50</sub> = 66 nM

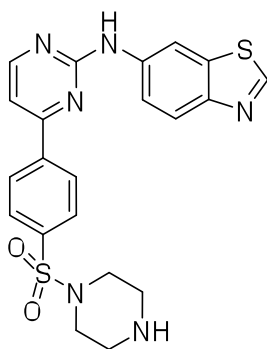

CAS 677753-19-4  
IC<sub>50</sub> = 60 nM

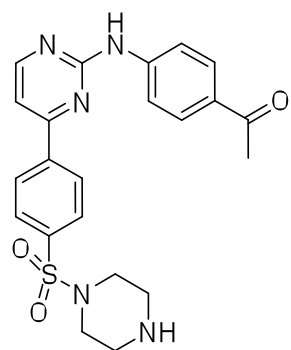

CAS 677753-20-7  
IC<sub>50</sub> = 59 nM

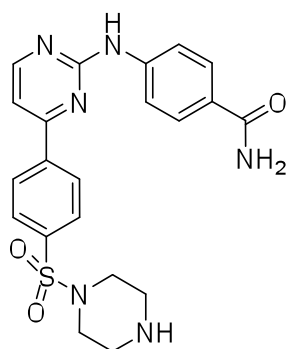

CAS 677753-20-8  
IC<sub>50</sub> = 48 nM

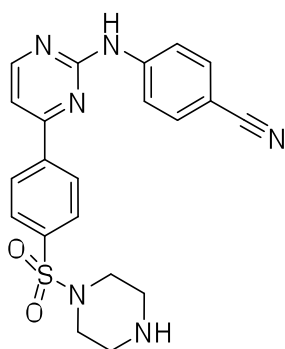

CAS 677753-22-9  
IC<sub>50</sub> = 44 nM

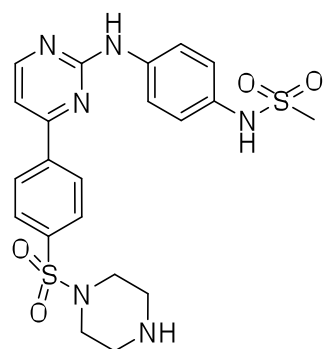

CAS 677753-23-0  
IC<sub>50</sub> = 43 nM

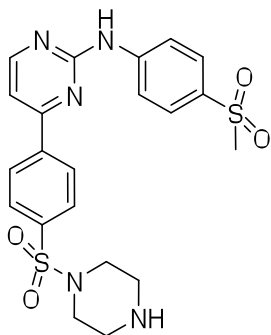

CAS 677753-24-1  
IC<sub>50</sub> = 31 nM

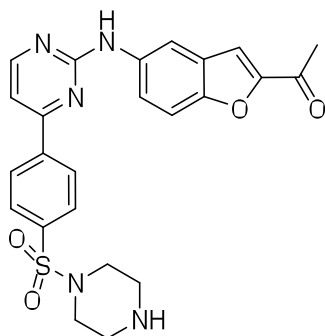

CAS 677753-25-2  
IC<sub>50</sub> = 26 nM

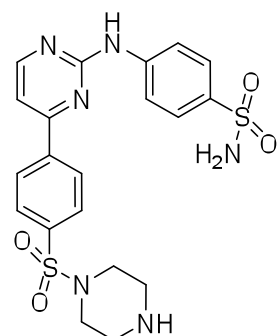

CAS 677753-26-3  
IC<sub>50</sub> = 11 nM  
**compound 5**

Bingham et al., 2008<sup>3</sup>

---

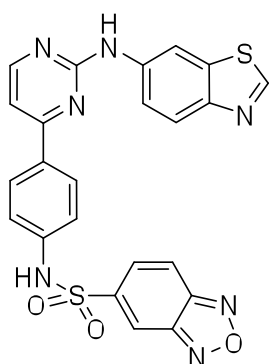

CAS 1042947-36-3  
IC<sub>50</sub> = 230 nM

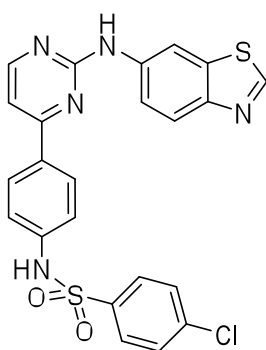

CAS 1042947-38-3  
IC<sub>50</sub> = 990 nM

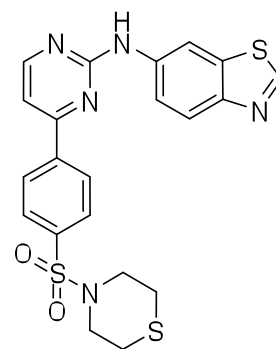

CAS 1042947-48-7  
IC<sub>50</sub> = 250 nM

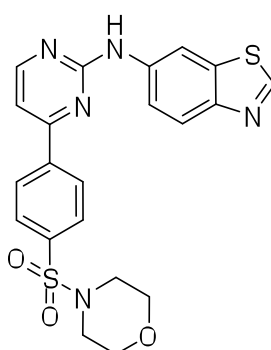

CAS 1042947-50-1  
IC<sub>50</sub> = 380 nM

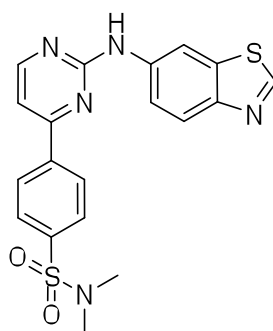

CAS 1042947-53-4  
IC<sub>50</sub> = 410 nM

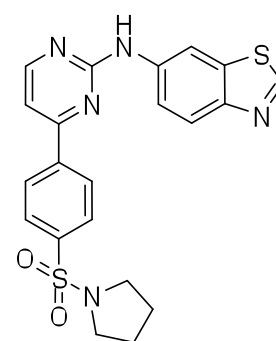

CAS 1042947-55-6  
IC<sub>50</sub> = 540 nM

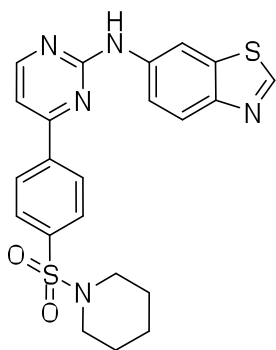

CAS 1042947-58-9  
 $IC_{50} = 600 \text{ nM}$

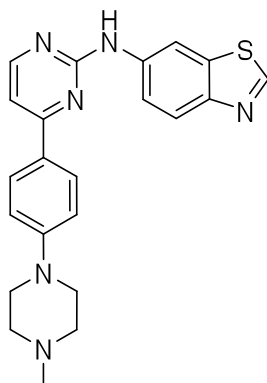

CAS 1042947-07-8  
 $IC_{50} = 410 \text{ nM}$

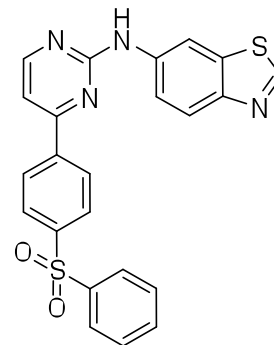

CAS 1042947-08-9  
 $IC_{50} = 440 \text{ nM}$

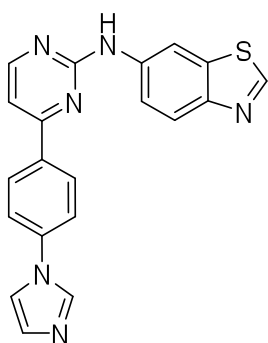

CAS 1042947-10-3  
 $IC_{50} = 700 \text{ nM}$

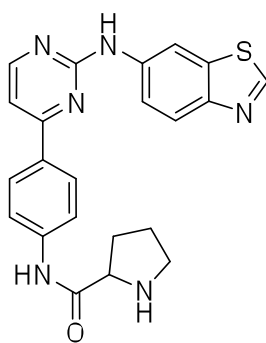

CAS 1042947-29-4  
 $IC_{50} = 130 \text{ nM}$

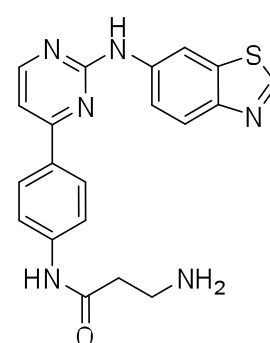

CAS 1042947-31-8  
 $IC_{50} = 270 \text{ nM}$

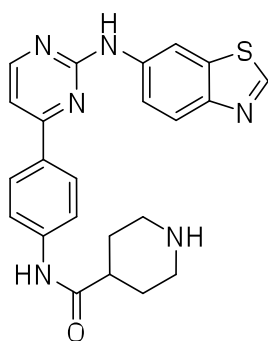

CAS 1042947-34-1  
 $IC_{50} = 400 \text{ nM}$

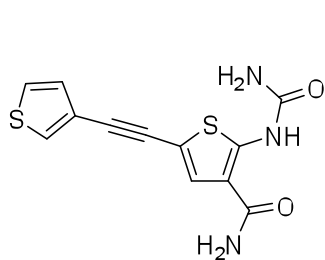

CAS 859809-23-7  
IC<sub>50</sub> = 420 nM

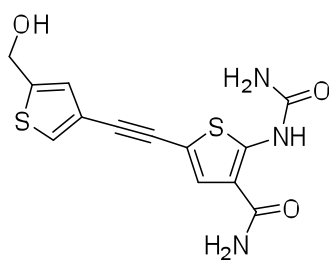

CAS 859809-24-8  
IC<sub>50</sub> = 195 nM

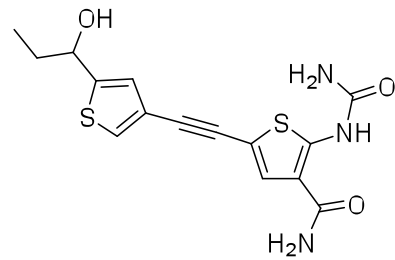

CAS 859809-25-9  
IC<sub>50</sub> = 465 nM

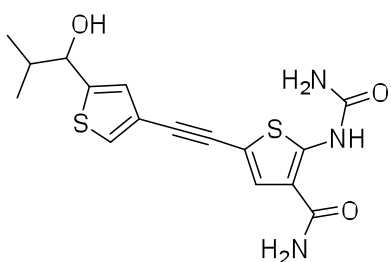

CAS 859809-26-0  
IC<sub>50</sub> = 563 nM

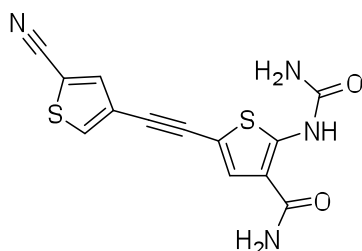

CAS 859809-27-1  
IC<sub>50</sub> = 333 nM

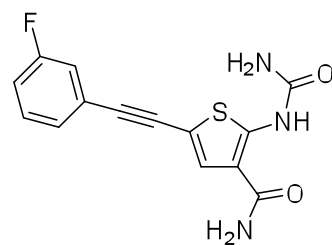

CAS 859809-28-2  
IC<sub>50</sub> = 331 nM

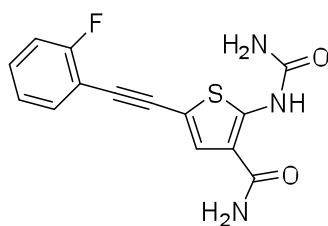

CAS 859809-29-3  
IC<sub>50</sub> = 620 nM

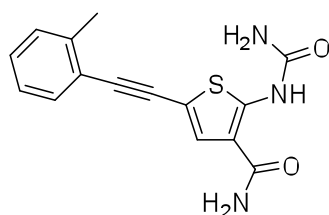

CAS 859809-31-7  
IC<sub>50</sub> = 716 nM

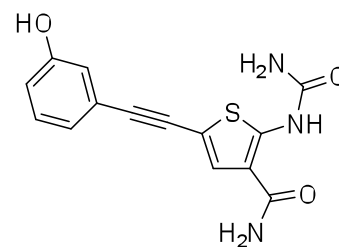

CAS 859809-32-8  
IC<sub>50</sub> = 303 nM

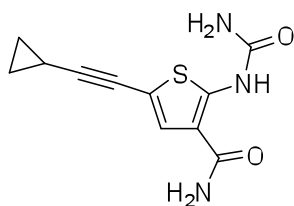

CAS 859809-33-9  
IC<sub>50</sub> = 273 nM

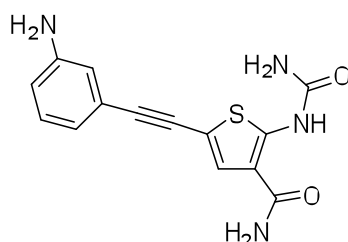

CAS 859809-34-0  
IC<sub>50</sub> = 709 nM

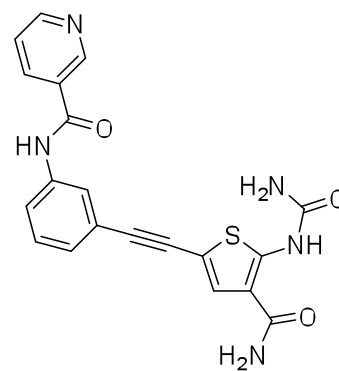

CAS 859809-36-2  
IC<sub>50</sub> = 557 nM

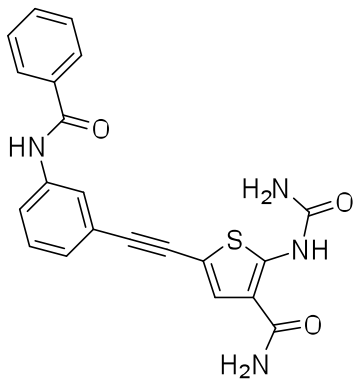

CAS 859809-38-4  
 $IC_{50} = 704 \text{ nM}$

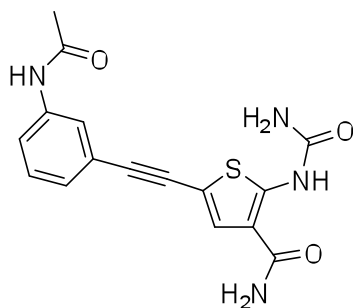

CAS 859809-39-5  
 $IC_{50} = 964 \text{ nM}$

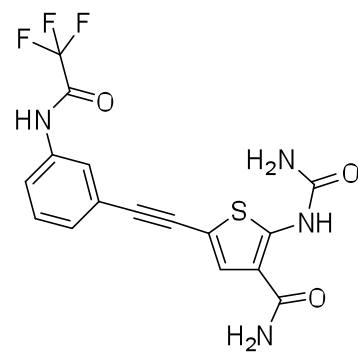

CAS 859809-40-8  
 $IC_{50} = 980 \text{ nM}$

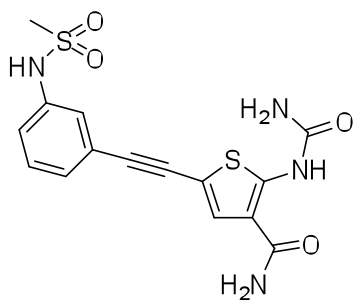

CAS 859809-43-1  
 $IC_{50} = 454 \text{ nM}$

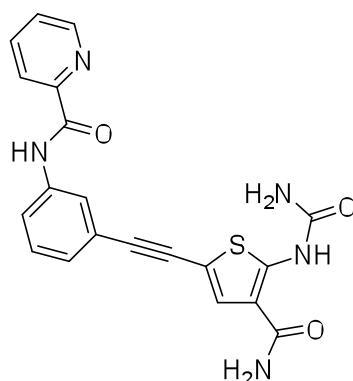

CAS 859809-35-1  
 $IC_{50} > 20 \text{ }\mu\text{M}$

Christopher et al., 2007<sup>5</sup>

---

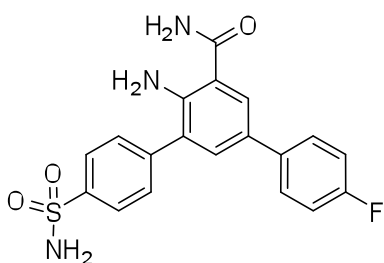

928655-85-0  
 $IC_{50} = 200 \text{ nM}$

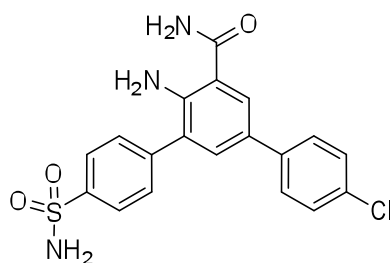

928655-63-4  
 $IC_{50} = 100 \text{ nM}$

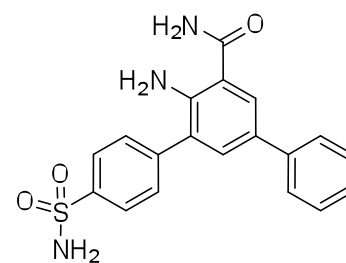

928655-16-0  
 $IC_{50} = 251 \text{ nM}$



Newton et al., 2007<sup>6</sup>

---

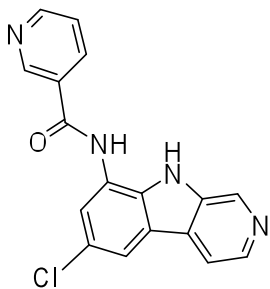

PS-1145  
CAS 431898-65-6  
IC<sub>50</sub> = 150 nM

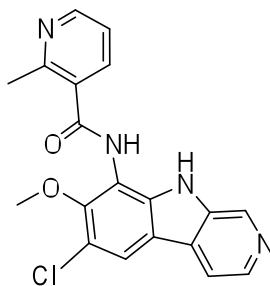

ML 120B  
CAS 783348-36-7  
IC<sub>50</sub> = 60 nM

Castro et al., 2003<sup>7</sup>

---

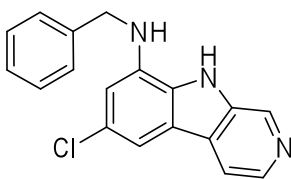

CAS 590398-78-0  
IC<sub>50</sub> > 20 μM

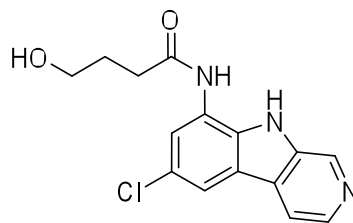

CAS 590398-81-5  
IC<sub>50</sub> > 20 μM

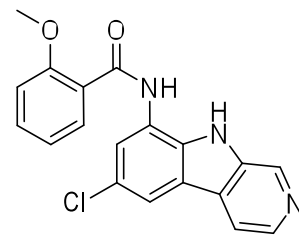

CAS 590398-88-2  
IC<sub>50</sub> > 20 μM

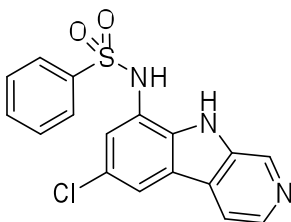

CAS 590398-93-9  
IC<sub>50</sub> > 20 μM

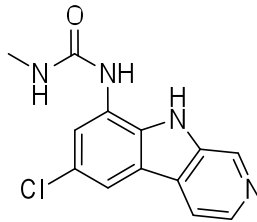

CAS 590398-96-2  
IC<sub>50</sub> > 20 μM

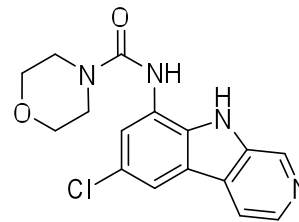

CAS 590398-98-4  
IC<sub>50</sub> > 20 μM

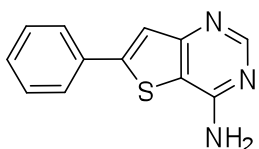

CAS 663918-11-4  
 $IC_{50} = 970 \text{ nM}$

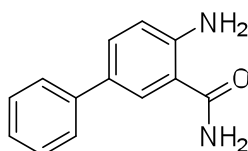

CAS 890402-92-3  
 $IC_{50} = 14.5 \text{ }\mu\text{M}$

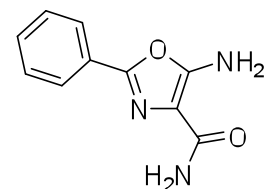

CAS 99185-68-9  
 $IC_{50} = 11 \text{ }\mu\text{M}$

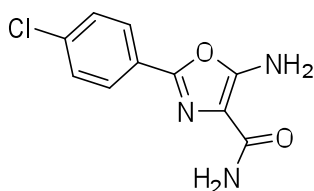

CAS 890402-94-5  
 $IC_{50} = 13.6 \text{ }\mu\text{M}$

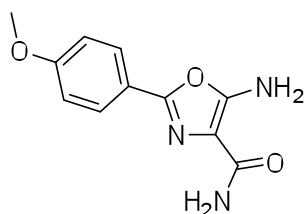

CAS 890402-95-6  
 $IC_{50} = 17.7 \text{ }\mu\text{M}$

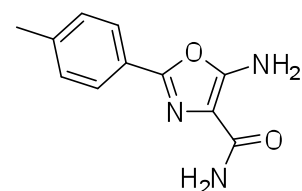

CAS 890402-96-7  
 $IC_{50} = 12.7 \text{ }\mu\text{M}$

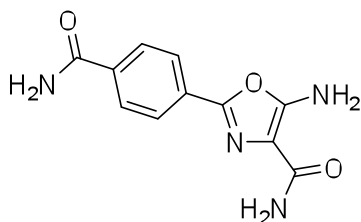

CAS 890402-98-9  
 $IC_{50} = 25.8 \text{ }\mu\text{M}$

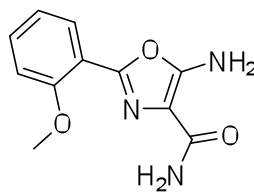

CAS 890403-00-6  
 $IC_{50} = 36.2 \text{ }\mu\text{M}$

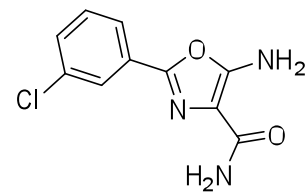

CAS 890403-02-8  
 $IC_{50} = 10.6 \text{ }\mu\text{M}$

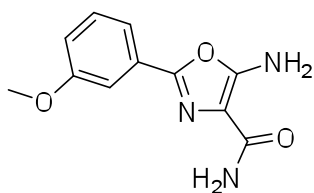

CAS 890403-03-9  
 $IC_{50} = 13.9 \text{ }\mu\text{M}$

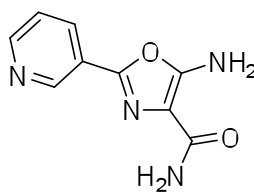

CAS 890403-07-3  
 $IC_{50} = 35.7 \text{ }\mu\text{M}$

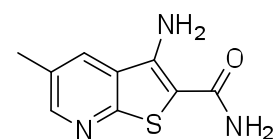

CAS 890403-08-4  
 $IC_{50} = 19.9 \text{ }\mu\text{M}$

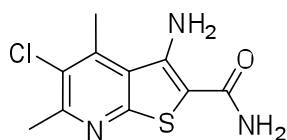

CAS 849425-30-5  
 $IC_{50} > 27.5 \mu M$

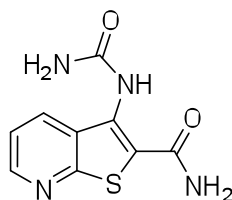

CAS 890403-09-5  
 $IC_{50} > 50 \mu M$

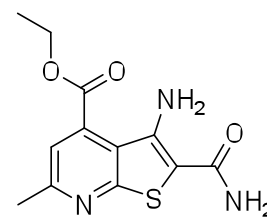

CAS 635731-83-8  
 $IC_{50} = 15.1 \mu M$

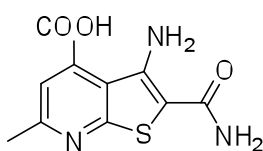

CAS 635731-85-0  
 $IC_{50} > 49 \mu M$

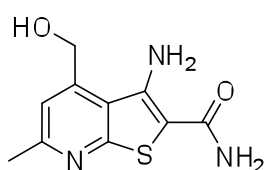

CAS 635731-89-4  
 $IC_{50} = 12.7 \mu M$

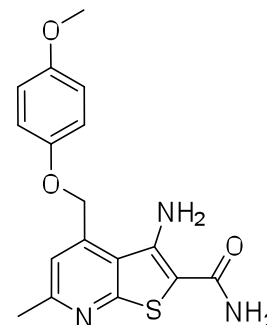

CAS 890403-11-9  
 $IC_{50} = 13 \mu M$

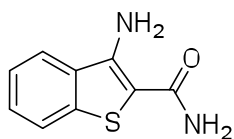

CAS 37839-59-1  
 $IC_{50} = 12.6 \mu M$

Palanki et al., 2003<sup>9</sup>

---

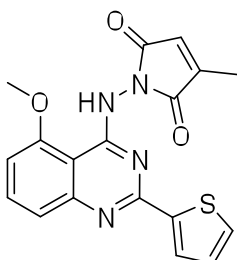

SPC 839  
CAS 219773-55-4  
 $IC_{50} = 62 nM$

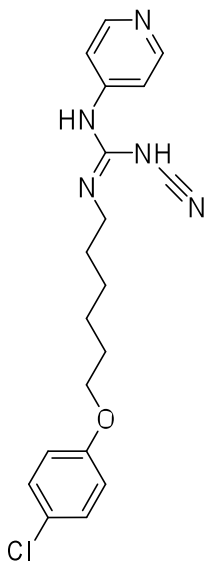

CHS-828  
CAS 200484-11-3  
 $IC_{50} = 8 \text{ nM}$

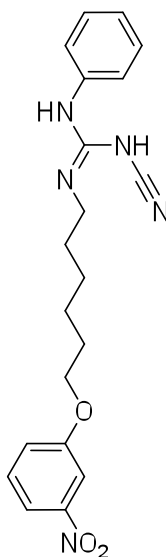

EO 759  
CAS 476156-99-7  
 $IC_{50} > 10 \text{ }\mu\text{M}$

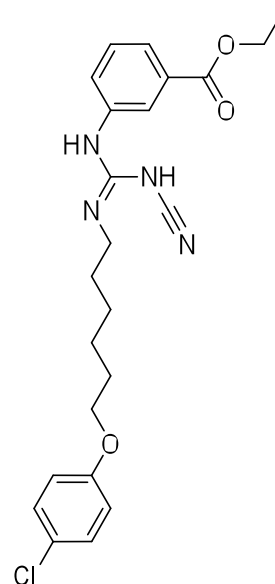

EO 807  
CAS 476157-00-3  
 $IC_{50} > 10 \text{ }\mu\text{M}$

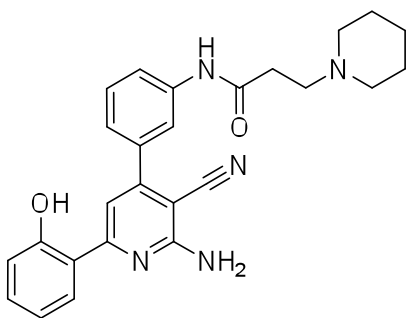

CAS 433957-88-1  
 $IC_{50} = 600 \text{ nM}$

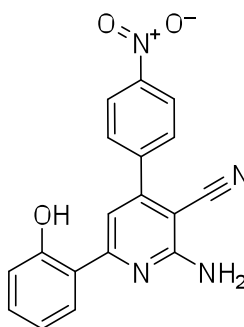

CAS 224818-33-1  
 $IC_{50} > 20 \text{ }\mu\text{M}$

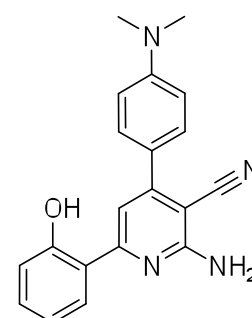

CAS 224818-37-5  
 $IC_{50} > 20 \text{ }\mu\text{M}$

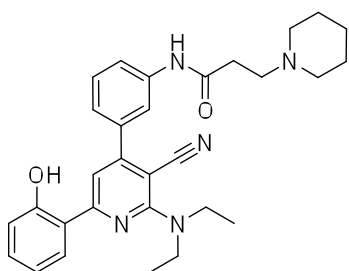

CAS 553635-45-3  
IC<sub>50</sub> = 20 μM

compound 7

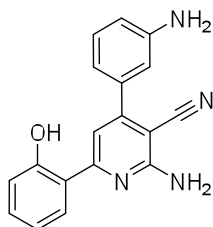

CAS 433958-64-6  
IC<sub>50</sub> = 20 μM

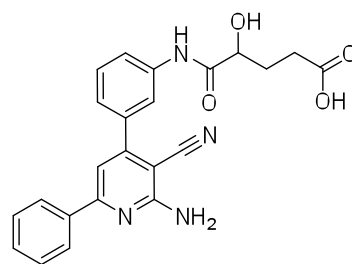

CAS 553635-52-2  
IC<sub>50</sub> > 20 μM

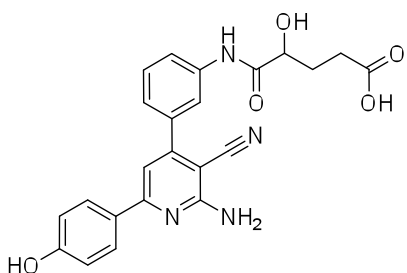

CAS 553635-53-3  
IC<sub>50</sub> > 20 μM

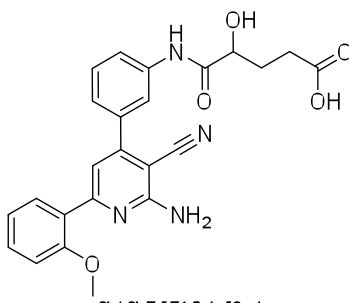

CAS 757184-52-4  
IC<sub>50</sub> > 20 μM

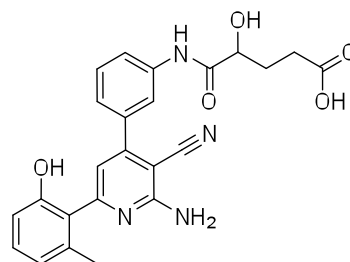

CAS 780035-19-0  
IC<sub>50</sub> > 20 μM

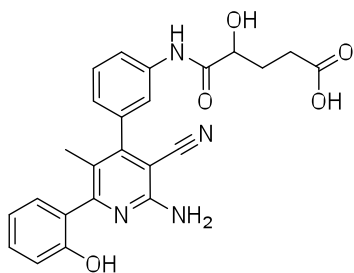

CAS 771472-73-2  
IC<sub>50</sub> > 20 μM

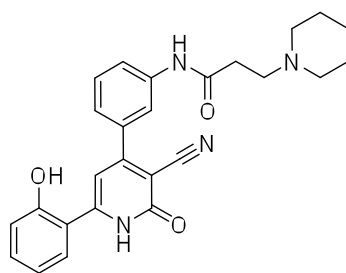

CAS 789487-07-6  
IC<sub>50</sub> > 20 μM

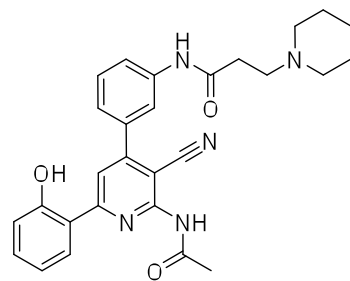

CAS 433958-95-3  
IC<sub>50</sub> = 15 μM

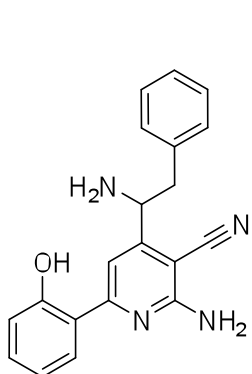

CAS 763083-78-9  
IC<sub>50</sub> = 60 nM

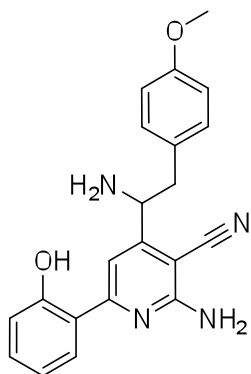

CAS 744215-79-0  
IC<sub>50</sub> = 80 nM

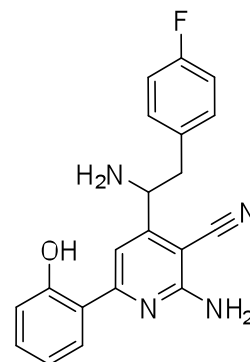

CAS 744215-80-3  
IC<sub>50</sub> = 40 nM

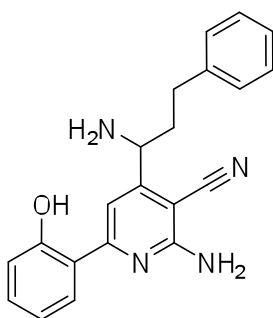

CAS 744215-81-4  
IC<sub>50</sub> = 730 nM

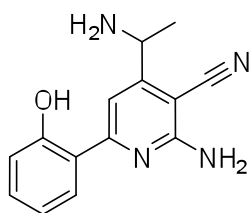

CAS 744215-82-5  
IC<sub>50</sub> = 150 nM

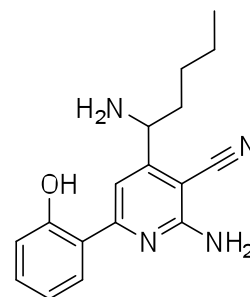

CAS 744215-83-6  
IC<sub>50</sub> = 480 nM

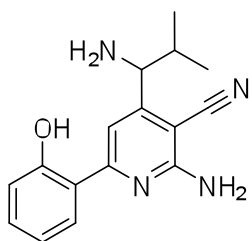

CAS 763083-78-9  
IC<sub>50</sub> = 60 nM

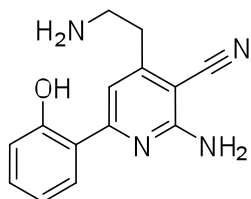

CAS 406209-10-7  
IC<sub>50</sub> = 70 nM

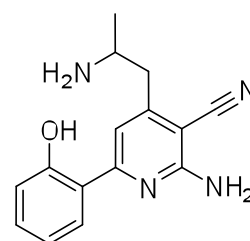

CAS 406209-08-3  
IC<sub>50</sub> = 470 nM

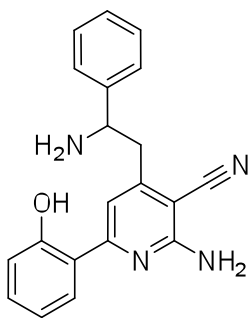

CAS 744215-85-8  
 $IC_{50} = 110 \text{ nM}$

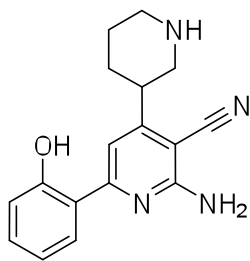

CAS 744215-99-4  
 $IC_{50} = 25 \text{ nM}$

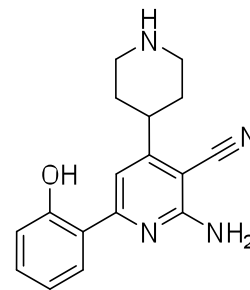

CAS 406208-79-5  
 $IC_{50} = 300 \text{ nM}$

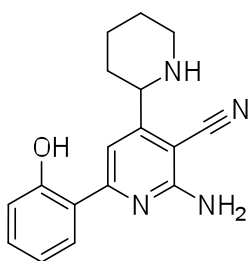

CAS 744216-02-2  
 $IC_{50} = 530 \text{ nM}$

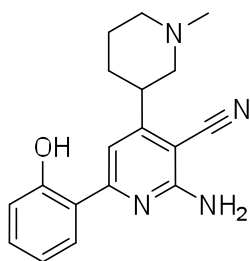

CAS 744216-03-3  
 $IC_{50} = 230 \text{ nM}$

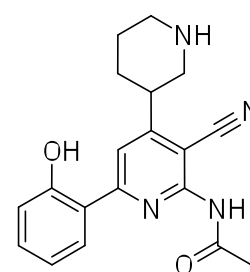

CAS 737749-44-9  
 $IC_{50} = 330 \text{ nM}$

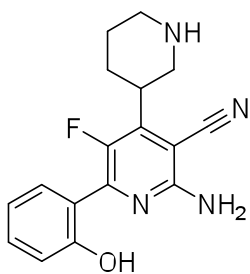

CAS 406208-69-3  
 $IC_{50} = 230 \text{ nM}$

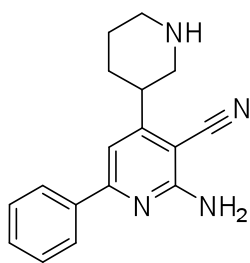

CAS 744216-04-4  
 $IC_{50} > 20 \text{ }\mu\text{M}$

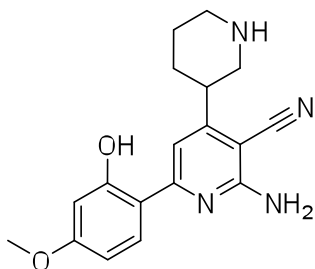

CAS 744217-81-0  
IC<sub>50</sub> = 560 nM

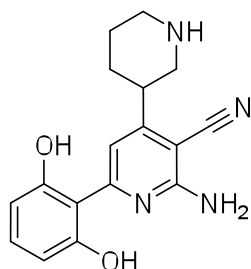

CAS 744910-98-2  
IC<sub>50</sub> = 15 nM

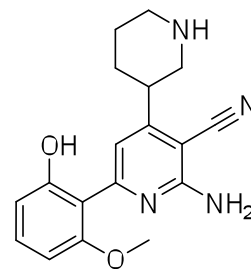

CAS 721394-10-1  
IC<sub>50</sub> = 34 nM

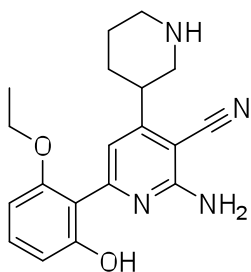

CAS 744217-83-2  
IC<sub>50</sub> = 14 nM

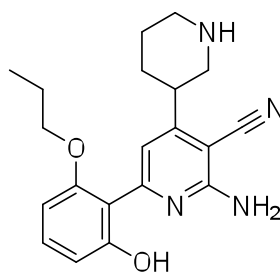

CAS 406208-17-1  
IC<sub>50</sub> = 5 nM

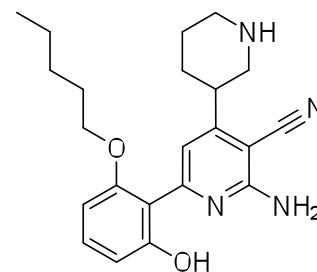

CAS 744217-84-3  
IC<sub>50</sub> = 6 nM

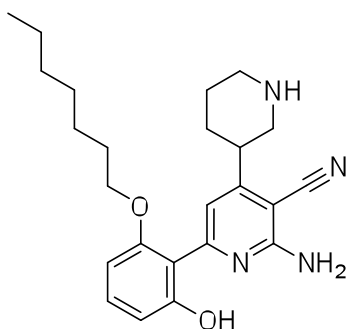

CAS 744217-85-4  
IC<sub>50</sub> = 14 nM

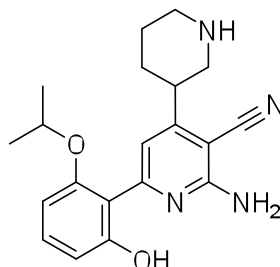

CAS 744217-86-5  
IC<sub>50</sub> = 81 nM

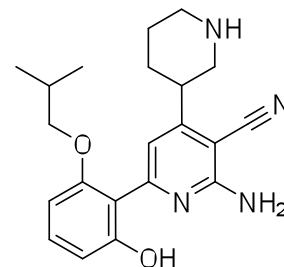

CAS 744217-87-6  
IC<sub>50</sub> = 5 nM



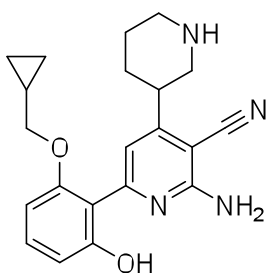

CAS 732239-51-9

IC<sub>50</sub> = 3 nM

compound 3

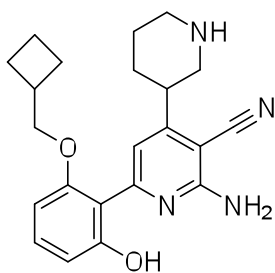

CAS 406208-21-7

IC<sub>50</sub> = 4 nM

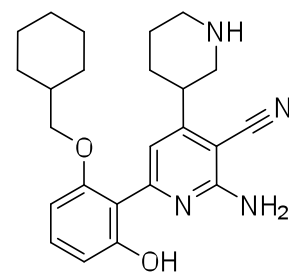

CAS 744217-88-7

IC<sub>50</sub> = 26 nM

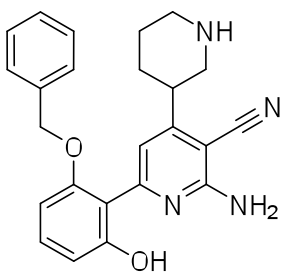

CAS 406208-16-0

IC<sub>50</sub> = 9 nM

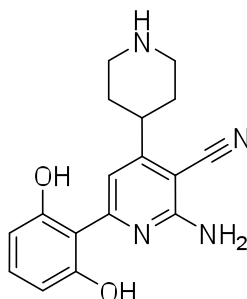

CAS 744217-98-8

IC<sub>50</sub> = 270 nM

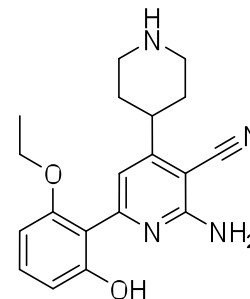

CAS 744217-90-1

IC<sub>50</sub> = 120 nM

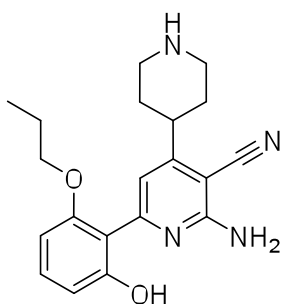

CAS 406208-52-4

IC<sub>50</sub> = 24 nM

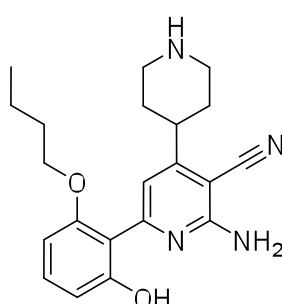

CAS 740792-29-4

IC<sub>50</sub> = 15 nM

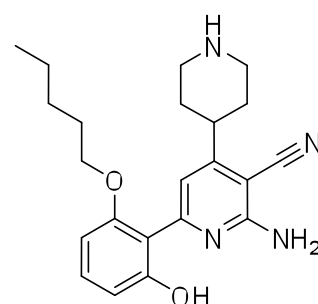

CAS 744217-92-3

IC<sub>50</sub> = 20 nM

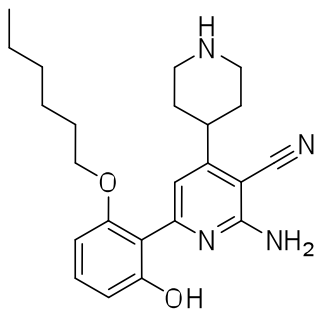

CAS 406208-63-7  
 $IC_{50} = 25 \text{ nM}$

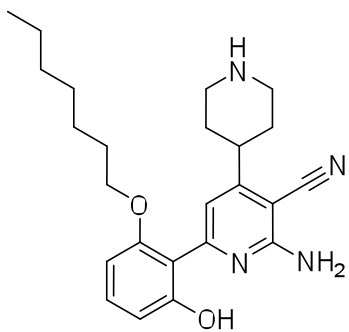

CAS 744217-93-4  
 $IC_{50} = 50 \text{ nM}$

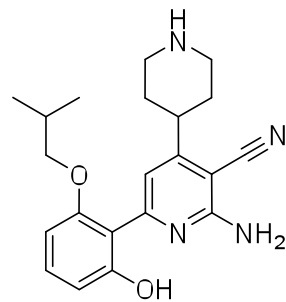

CAS 744217-94-5  
 $IC_{50} = 15 \text{ nM}$

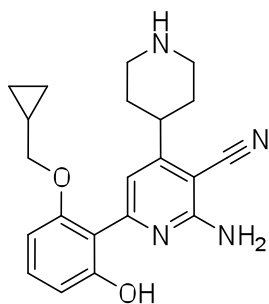

CAS 406208-42-2  
 $IC_{50} = 8.5 \text{ nM}$

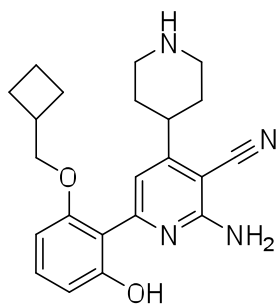

CAS 744217-54-6  
 $IC_{50} = 12 \text{ nM}$

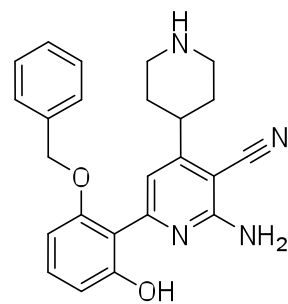

CAS 744217-95-6  
 $IC_{50} = 110 \text{ nM}$

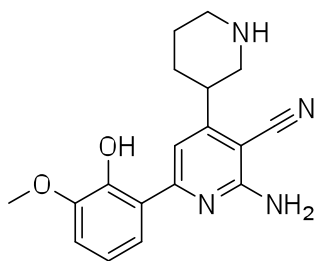

CAS 744217-80-9  
 $IC_{50} = 20 \text{ }\mu\text{M}$

Haddad et al., 2005<sup>14</sup>

---

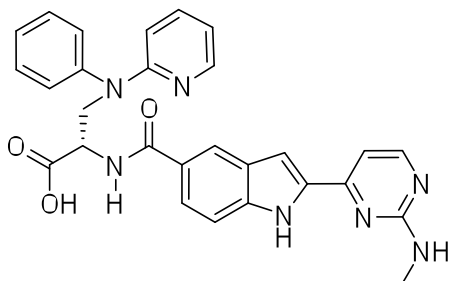

CAS 869796-50-9

IC<sub>50</sub> = 0.4 nM

compound 1

Podolin et al., 2003<sup>15</sup>

---

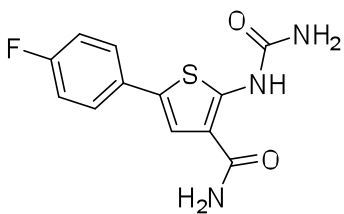

TPCA-1

CAS 507475-17-4

IC<sub>50</sub> = 17.9 nM

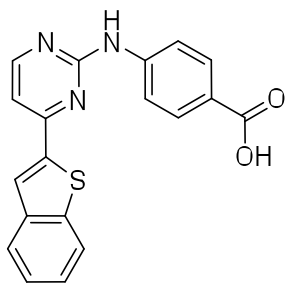

CAS 873225-30-0  
IC<sub>50</sub> = 600 nM

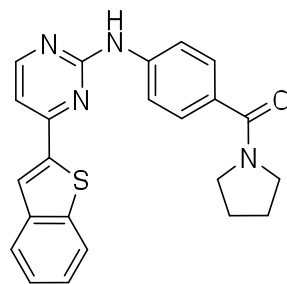

CAS 873225-40-2  
IC<sub>50</sub> = 900 nM

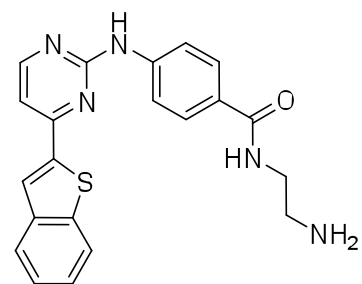

CAS 873225-41-3  
IC<sub>50</sub> = 600 nM

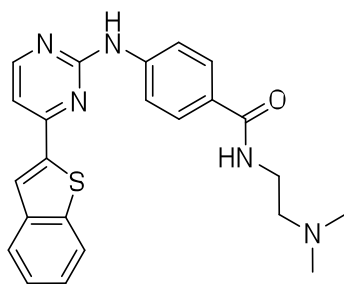

CAS 873225-42-4  
IC<sub>50</sub> = 200 nM

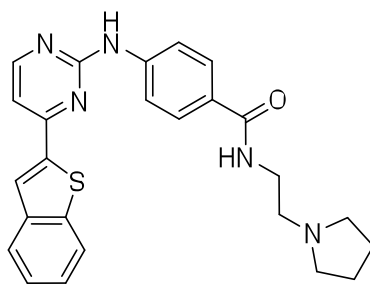

CAS 873225-44-6  
IC<sub>50</sub> = 400 nM

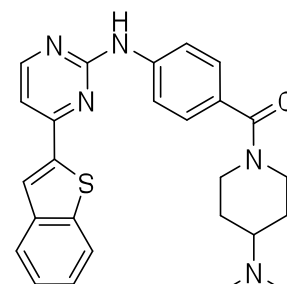

CAS 873225-45-7  
IC<sub>50</sub> = 40 nM

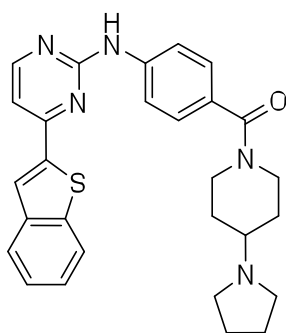

CAS 873225-46-8  
IC<sub>50</sub> = 40 nM

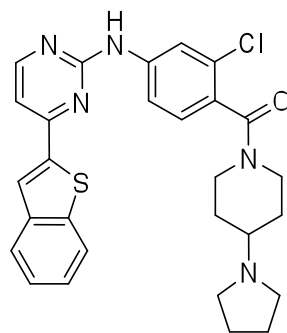

CAS 873225-47-9  
IC<sub>50</sub> = 90 nM

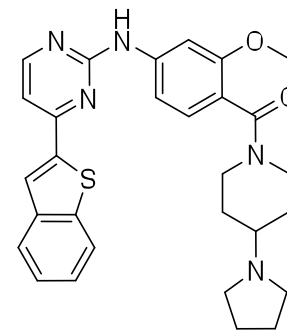

CAS 873225-48-0  
IC<sub>50</sub> = 50 nM

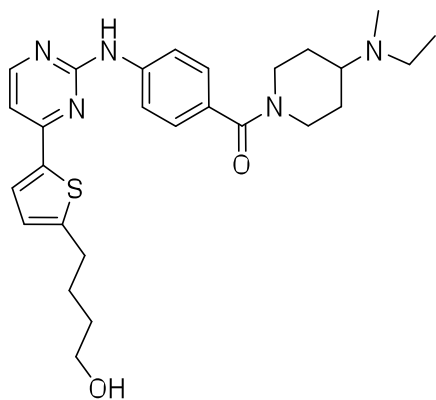

CAS 873225-56-0  
 $IC_{50} = 25 \text{ nM}$

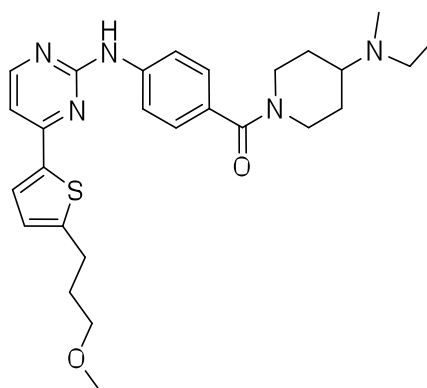

CAS 873225-57-1  
 $IC_{50} = 100 \text{ nM}$

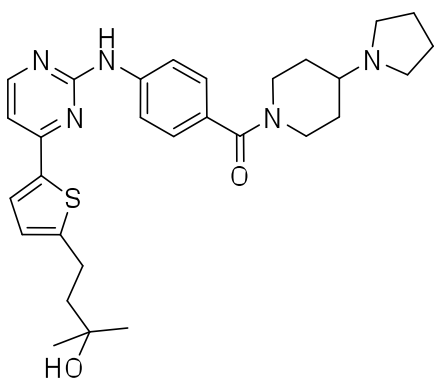

CAS 873225-58-2  
 $IC_{50} = 50 \text{ nM}$

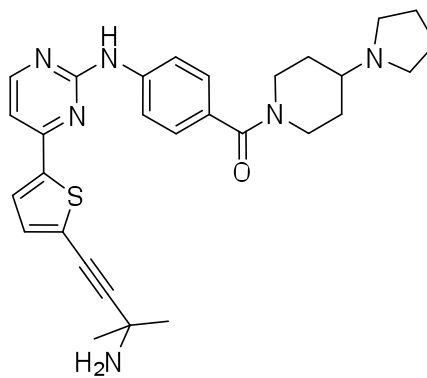

CAS 873225-59-3  
 $IC_{50} = 150 \text{ nM}$

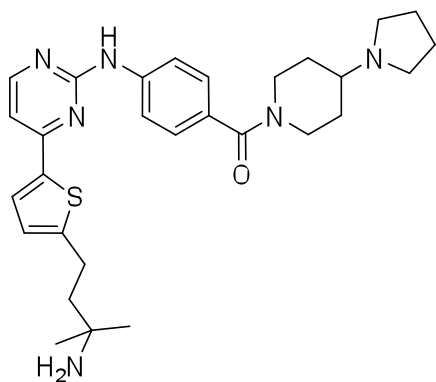

CAS 873225-60-6  
 $IC_{50} = 40 \text{ nM}$

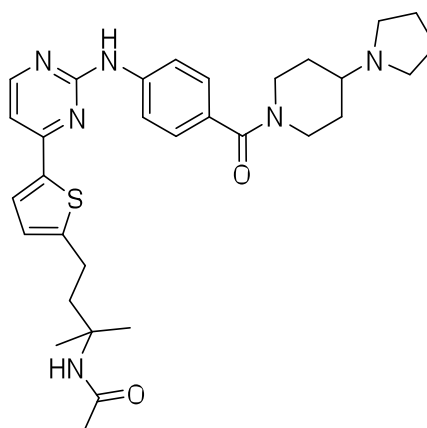

CAS 873225-61-7  
 $IC_{50} = 150 \text{ nM}$

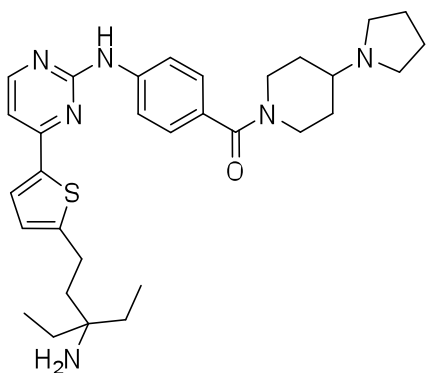

CAS 873225-62-8  
 $IC_{50} = 60 \text{ nM}$

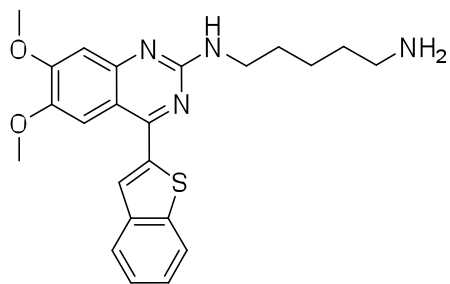

CAS -  
 $IC_{50} = 30 \mu\text{M}$

**compound 6**

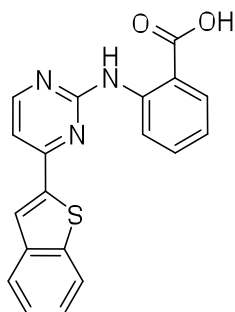

CAS 873225-32-2  
 $IC_{50} > 100 \mu\text{M}$

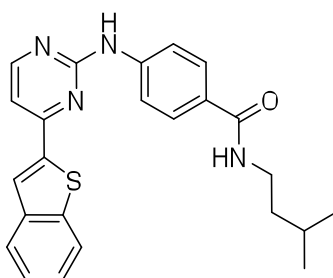

CAS 873225-43-5  
 $IC_{50} > 100 \mu\text{M}$

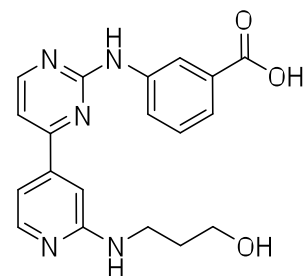

CAS 164658-21-3  
 $IC_{50} = 15 \mu\text{M}$

Ziegelbauer et al, 2005<sup>17</sup>

---

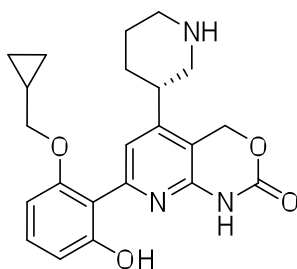

CAS 600734-02-9  
 $IC_{50} = 2 \text{ nM}$

**compound 2**

## 2) Molecular docking of biologically active compound into a homology model of IKK- $\beta$

The homology model of IKK- $\beta$  was available from the SWISS-MODELER repository.<sup>18-20</sup> Docking experiments were conducted using GOLD 3.1.<sup>21</sup> A starting 3D geometry for compound **8** was generated with CORINA<sup>22</sup>, a commonly used 2D to 3D molecular structure converter. Afterwards, we selected the hinge region (Glu97) acceptor- (Cys99) donor- (Cys99) acceptor as essential constraints for the docking experiments. Lauria et al., who recently reported a docking-based molecular modeling study on IKK- $\beta$  inhibitors, emphasized that the protein flexibility has to be accounted for in order to retrieve more reliable results.<sup>23</sup> Following these findings, we conducted induced-fit docking in GOLD by defining the gatekeeper residue Met96 as flexible.

## References

1. Baxter, A.; Brough, S.; Cooper, A.; Floettmann, E.; Foster, S.; Harding, C.; Kettle, J.; McInally, T.; Martin, C.; Mobbs, M.; Needham, M.; Newham, P.; Paine, S.; St-Gallay, S.; Salter, S.; Unitt, J.; Xue, Y. Hit-to-lead studies: the discovery of potent, orally active, thiophenecarboxamide IKK-2 inhibitors. *Bioorg. Med. Chem. Lett.* **2004**, *14*, 2817-2822.
2. Bingham, A. H.; Davenport, R. J.; Gowers, L.; Knight, R. L.; Lowe, C.; Owen, D. A.; Parry, D. M.; Pitt, W. R. A novel series of potent and selective IKK2 inhibitors. *Bioorg. Med. Chem. Lett.* **2004**, *14*, 409-412.
3. Bingham, A. H.; Davenport, R. J.; Fosbeary, R.; Gowers, L.; Knight, R. L.; Lowe, C.; Owen, D. A.; Parry, D. M.; Pitt, W. R. Synthesis and structure-activity relationship of aminopyrimidine IKK2 inhibitors. *Bioorg. Med. Chem. Lett.* **2008**, *18*, 3622-3627.
4. Bonafoux, D.; Bonar, S.; Christine, L.; Clare, M.; Donnelly, A.; Guzova, J.; Kishore, N.; Lennon, P.; Libby, A.; Mathialagan, S.; McGhee, W.; Rouw, S.; Sommers, C.; Tollefson, M.; Tripp, C.; Weier, R.; Wolfson, S.; Min, Y. Inhibition of IKK-2 by 2-[(aminocarbonyl)amino]-5-acetylenyl-3-thiophenecarboxamides. *Bioorg. Med. Chem. Lett.* **2005**, *15*, 2870-2875.
5. Christopher, J. A.; Avitabile, B. G.; Bamborough, P.; Champigny, A. C.; Cutler, G. J.; Dyos, S. L.; Grace, K. G.; Kerns, J. K.; Kitson, J. D.; Mellor, G. W.; Morey, J. V.; Morse, M. A.; O'Malley, C. F.; Patel, C. B.; Probst, N.; Rumsey, W.; Smith, C. A.; Wilson, M. J. The discovery of 2-amino-3,5-diarylbenzamide inhibitors of IKK-alpha and IKK-beta kinases. *Bioorg. Med. Chem. Lett.* **2007**, *17*, 3972-3977.
6. Newton, R.; Holden, N. S.; Catley, M. C.; Oyelusi, W.; Leigh, R.; Proud, D.; Barnes, P. J. Repression of inflammatory gene expression in human pulmonary epithelial cells by small-molecule IkappaB kinase inhibitors. *J. Pharmacol. Exp. Ther.* **2007**, *321*, 734-742.
7. Castro, A. C.; Dang, L. C.; Soucy, F.; Grenier, L.; Mazdiyasni, H.; Hottelet, M.; Parent, L.; Pien, C.; Palombella, V.; Adams, J. Novel IKK inhibitors: beta-carbolines. *Bioorg. Med. Chem. Lett.* **2003**, *13*, 2419-2422.
8. Morwick, T.; Berry, A.; Brickwood, J.; Cardozo, M.; Catron, K.; DeTuri, M.; Emeigh, J.; Homon, C.; Hrapchak, M.; Jacober, S.; Jakes, S.; Kaplita, P.; Kelly, T. A.; Ksiazek, J.; Liuzzi, M.; Magolda, R.; Mao, C.; Marshall, D.; McNeil, D.; Prokopowicz, A., 3rd; Sarko, C.; Scouten, E.; Sledziona, C.; Sun, S.; Watrous, J.; Wu, J. P.; Cywin, C. L. Evolution of the thienopyridine class of inhibitors of IkappaB kinase-beta: part I: hit-to-lead strategies. *J. Med. Chem.* **2006**, *49*, 2898-2908.
9. Palanki, M. S.; Erdman, P. E.; Ren, M.; Suto, M.; Bennett, B. L.; Manning, A.; Ransone, L.; Spooner, C.; Desai, S.; Ow, A.; Totsuka, R.; Tsao, P.; Toriumi, W. The design and synthesis of novel orally active inhibitors of AP-1 and NF-kappaB mediated transcriptional activation. SAR of in vitro and in vivo studies. *Bioorg. Med. Chem. Lett.* **2003**, *13*, 4077-4080.
10. Olsen, L. S.; Hjarnaa, P. J.; Latini, S.; Holm, P. K.; Larsson, R.; Bramm, E.; Binderup, L.; Madsen, M. W. Anticancer agent CHS 828 suppresses nuclear factor-kappa B



activity in cancer cells through downregulation of IKK activity. *Int. J. Cancer* **2004**, 111, 198-205.

11. Murata, T.; Shimada, M.; Sakakibara, S.; Yoshino, T.; Kadono, H.; Masuda, T.; Shimazaki, M.; Shintani, T.; Fuchikami, K.; Sakai, K.; Inbe, H.; Takeshita, K.; Niki, T.; Umeda, M.; Bacon, K. B.; Ziegelbauer, K. B.; Lowinger, T. B. Discovery of novel and selective IKK-beta serine-threonine protein kinase inhibitors. Part 1. *Bioorg. Med. Chem. Lett.* **2003**, 13, 913-918.

12. Murata, T.; Shimada, M.; Kadono, H.; Sakakibara, S.; Yoshino, T.; Masuda, T.; Shimazaki, M.; Shintani, T.; Fuchikami, K.; Bacon, K. B.; Ziegelbauer, K. B.; Lowinger, T. B. Synthesis and structure-activity relationships of novel IKK-beta inhibitors. Part 2: Improvement of in vitro activity. *Bioorg. Med. Chem. Lett.* **2004**, 14, 4013-4017.

13. Muegge, I. Synergies of virtual screening approaches. *Mini Rev. Med. Chem.* **2008**, 8, 927-933.

14. Haddad, E.-B.; Ritzeler, O.; Aldous, D. J.; Cox, P. J. Substantially pure 2-{{2-(2-methylamino-pyrimidin-4-yl)-1h-indole-5-carbonyl]-amino}-3-(phenylpyridin-2-yl-amino)-propionic acid as an IKb kinase inhibitor. US 2007/0142417 A1, Nov. 13, 2006, 2005.

15. Podolin, P. L.; Callahan, J. F.; Bolognese, B. J.; Li, Y. H.; Carlson, K.; Davis, T. G.; Mellor, G. W.; Evans, C.; Roshak, A. K. Attenuation of murine collagen-induced arthritis by a novel, potent, selective small molecule inhibitor of IkappaB Kinase 2, TPCA-1, occurs via reduction of proinflammatory cytokines and antigen-induced T cell Proliferation. *J. Pharmacol. Exp. Ther.* **2005**, 312, 373-381.

16. Waelchli, R.; Bollbuck, B.; Bruns, C.; Buhl, T.; Eder, J.; Feifel, R.; Hersperger, R.; Janser, P.; Revesz, L.; Zerwes, H. G.; Schlapbach, A. Design and preparation of 2-benzamido-pyrimidines as inhibitors of IKK. *Bioorg. Med. Chem. Lett.* **2006**, 16, 108-112.

17. Ziegelbauer, K.; Gantner, F.; Lukacs, N. W.; Berlin, A.; Fuchikami, K.; Niki, T.; Sakai, K.; Inbe, H.; Takeshita, K.; Ishimori, M.; Komura, H.; Murata, T.; Lowinger, T.; Bacon, K. B. A selective novel low-molecular-weight inhibitor of IkappaB kinase-beta (IKK-beta) prevents pulmonary inflammation and shows broad anti-inflammatory activity. *Br. J. Pharmacol.* **2005**, 145, 178-192.

18. <http://swissmodel.expasy.org/repository/>

19. Kiefer, F.; Arnold, K.; Kunzli, M.; Bordoli, L.; Schwede, T. *Nucleic Acids Res* **2009**, 37, D387-392.

20. Kiefer, F.; Schwede, T. *Nucleic Acids Res* **2004**, 32, D230-234.

21. GOLD Suite 3.1 The Cambridge Crystallographic Data CentresCCDC: Cambridge, UK

22. CORINA - Generation of 3D coordinates, version 3.0, Molecular Networks GmbH, Erlangen; Germany

23. Lauria, A.; Ippolito, M.; Fazzari, M.; Tutone, M.; Di Blasi, F.; Mingoia, F.; Almerico, A. M. *J Mol Graph Model* **2010**, *29*, 72.
